# Supplementary material for: Sensitivity of air quality indicators to emission inventories (EDGAR, EMEP, CAMS-REG) in Europe through FAIRMODE benchmarking methodology
Source: Copernicus journal article supplement (doi:10.5194/egusphere-2023-1168), 2023-06-29
Supplement: Supplementary file 1 [file egusphere-2023-1168-supplement.pdf]

Supplement of:

## Sensitivity of air quality indicators to emission inventories (EDGAR, EMEP, CAMS-REG) in Europe through FAIRMODE benchmarking methodology.

5 Alexander de Meijl<sup>1</sup>, Cornelis Cuvelier<sup>2\*</sup>, Philippe Thunis<sup>2</sup>, Enrico Pisoni<sup>2</sup>, Bertrand Bessagnet<sup>2</sup>

<sup>1</sup>MetClim, Varese, 21025, Italy

<sup>2</sup> European Commission, Joint Research Centre (JRC), 21027, Ispra, Italy

♦ retired with Active Senior Agreement

10

**Table S1 List of local domains selected, with their corresponding area for emission reductions.**

| Country           | City      |     | lon<br>min | lon<br>max | lat<br>min | lat<br>max |
|-------------------|-----------|-----|------------|------------|------------|------------|
| Belgium           | Brussels  | BRU | 4.05       | 4.65       | 50.55      | 51.15      |
| Germany           | Berlin    | BER | 12.76      | 14.06      | 51.87      | 53.17      |
| Italy             | Rome      | ROM | 12.09      | 12.89      | 41.5       | 42.3       |
| Spain             | Madrid    | MAD | -4.15      | -3.25      | 39.96      | 40.86      |
| Sweden            | Stockholm | STO | 17.62      | 18.52      | 58.88      | 59.78      |
| Romania           | Bucharest | BUC | 25.90      | 26.30      | 44.23      | 44.63      |
| Malopolska region |           | MAL | 18.0       | 23.0       | 48.7       | 51.5       |
| Po Valley         |           | POV | 6.5        | 14.0       | 43.5       | 47.0       |

**Table S2 Overview GNFR sectors**

| GNFR sector           |
|-----------------------|
| A PublicPower         |
| B Industry            |
| C OtherStationaryComb |
| D Fugitive            |
| E Solvents            |
| F RoadTransport       |
| G Shipping            |
| H Aviation            |
| I OffRoad             |
| J Waste               |
| K AgriLiveStock       |
| L AgriOther           |
| M Other               |

15

**Table S3. Overview total emissions per emission inventory for the different locations, mg/m<sup>2</sup>/day**

| PPM        | EMEPE | EMEPG | EMEPC2 | EMEPC42C |
|------------|-------|-------|--------|----------|
| Berlin     | 1.82  | 1.38  | 1.64   | 1.93     |
| Brussels   | 4.38  | 4.34  | 5.19   | 4.94     |
| Bucharest  | 7.63  | 3.06  | 8.04   | 8.16     |
| Madrid     | 3.24  | 2.41  | 3.06   | 3.47     |
| Malopolska | 3.49  | 2.41  | 2.68   | 3.21     |
| Po Valley  | 1.65  | 1.45  | 1.40   | 1.51     |
| Rome       | 2.63  | 2.48  | 2.44   | 2.52     |
| Stockholm  | 3.33  | 3.09  | 1.69   | 2.19     |

| VOC        | EMEPE | EMEPG | EMEPC2 | EMEPC42C |
|------------|-------|-------|--------|----------|
| Berlin     | 15.65 | 7.67  | 8.55   | 8.78     |
| Brussels   | 40.50 | 15.29 | 16.13  | 14.93    |
| Bucharest  | 26.35 | 15.73 | 28.15  | 21.40    |
| Madrid     | 21.28 | 18.97 | 20.31  | 19.00    |
| Malopolska | 12.11 | 6.71  | 6.35   | 7.06     |
| Po Valley  | 6.65  | 6.72  | 6.08   | 5.74     |
| Rome       | 21.05 | 16.66 | 17.69  | 16.02    |
| Stockholm  | 18.13 | 7.63  | 9.69   | 9.46     |

20

| NOx        | EMEPE | EMEPG | EMEPC2 | EMEPC42C |
|------------|-------|-------|--------|----------|
| Berlin     | 9.76  | 8.50  | 7.72   | 8.24     |
| Brussels   | 31.57 | 27.21 | 31.05  | 28.16    |
| Bucharest  | 13.94 | 17.01 | 19.93  | 18.28    |
| Madrid     | 16.15 | 16.59 | 19.44  | 15.05    |
| Malopolska | 7.36  | 7.79  | 8.20   | 8.04     |
| Po Valley  | 5.23  | 5.62  | 5.48   | 5.16     |
| Rome       | 12.01 | 11.54 | 12.26  | 10.11    |
| Stockholm  | 10.71 | 7.41  | 7.01   | 6.03     |

| SOx        | EMEPE | EMEPG | EMEPC2 | EMEPC42C |
|------------|-------|-------|--------|----------|
| Berlin     | 3.82  | 1.48  | 1.65   | 1.57     |
| Brussels   | 7.23  | 2.56  | 3.07   | 2.75     |
| Bucharest  | 9.51  | 7.49  | 5.95   | 6.00     |
| Madrid     | 6.54  | 2.43  | 2.56   | 2.69     |
| Malopolska | 8.72  | 8.71  | 8.69   | 8.86     |
| Po Valley  | 1.31  | 0.73  | 0.82   | 0.81     |
| Rome       | 2.25  | 0.74  | 0.94   | 0.79     |
| Stockholm  | 11.43 | 0.67  | 1.03   | 0.80     |

| NH3        | EMEPE | EMEPG | EMEPC2 | EMEPC42C |
|------------|-------|-------|--------|----------|
| Berlin     | 4.02  | 2.26  | 3.77   | 3.25     |
| Brussels   | 7.69  | 3.34  | 5.36   | 5.11     |
| Bucharest  | 3.34  | 4.40  | 6.89   | 6.69     |
| Madrid     | 3.24  | 1.91  | 3.13   | 3.60     |
| Malopolska | 3.52  | 1.27  | 1.79   | 2.05     |
| Po Valley  | 4.58  | 3.16  | 3.24   | 3.17     |
| Rome       | 3.65  | 2.41  | 2.52   | 1.88     |
| Stockholm  | 1.67  | 0.61  | 1.06   | 0.60     |

25

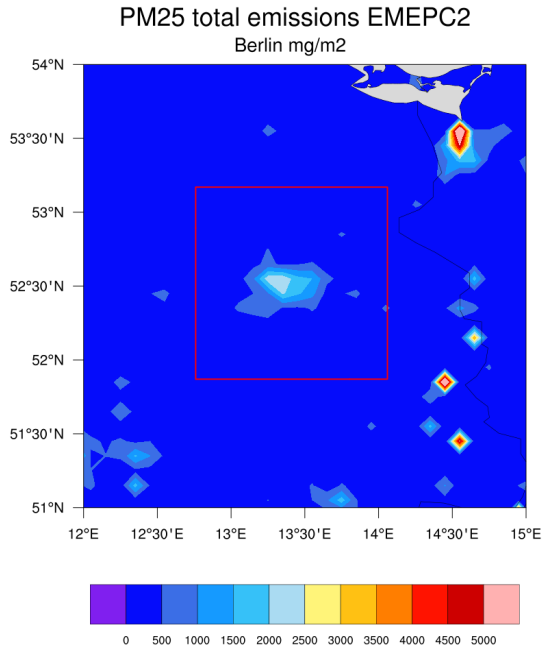

(a)

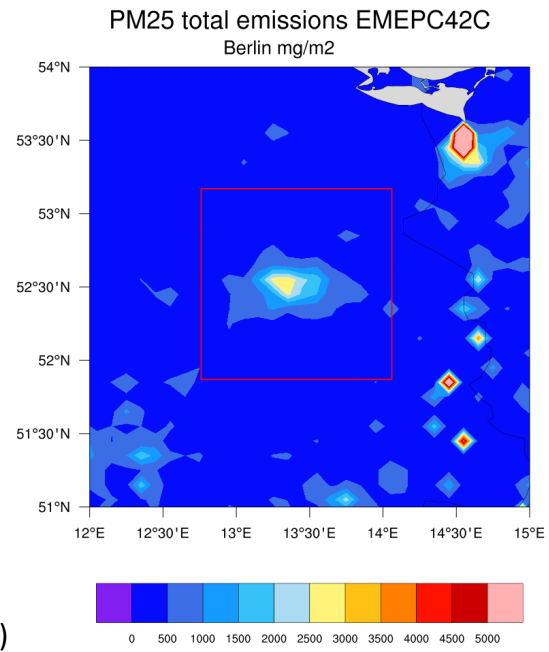

(b)

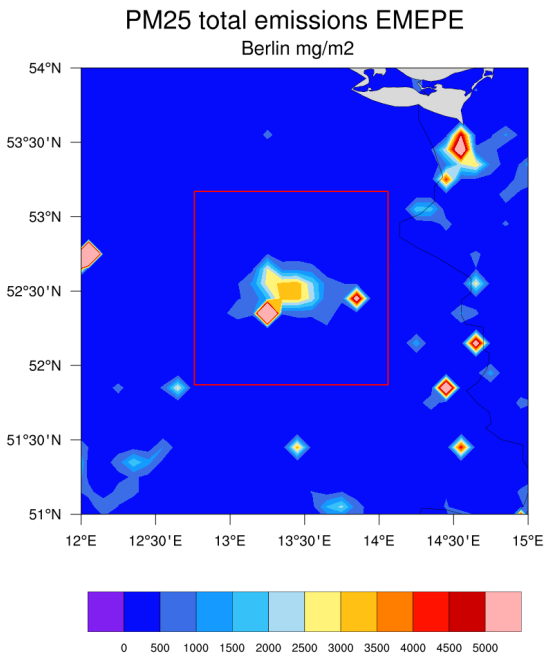

(c)

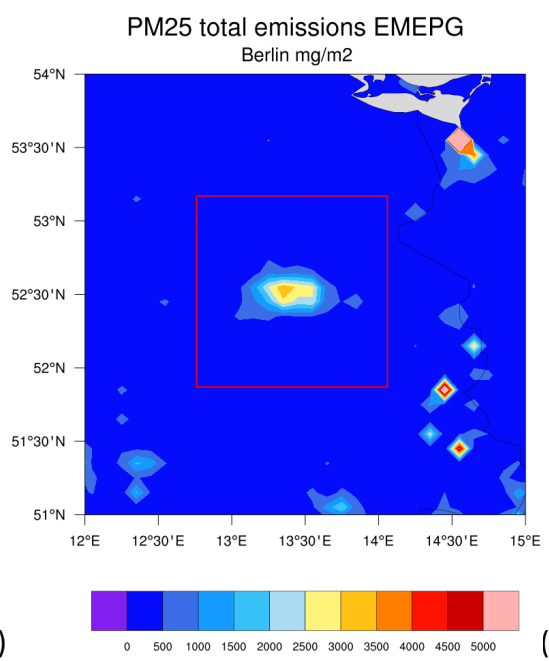

(d)

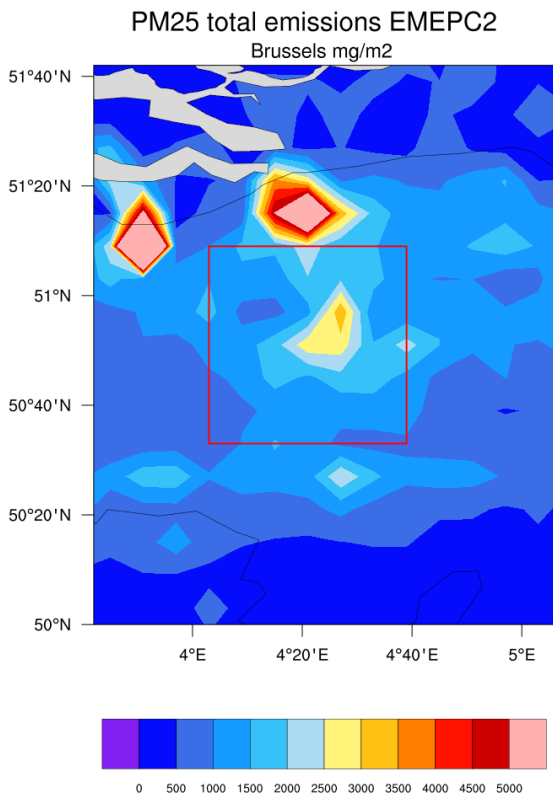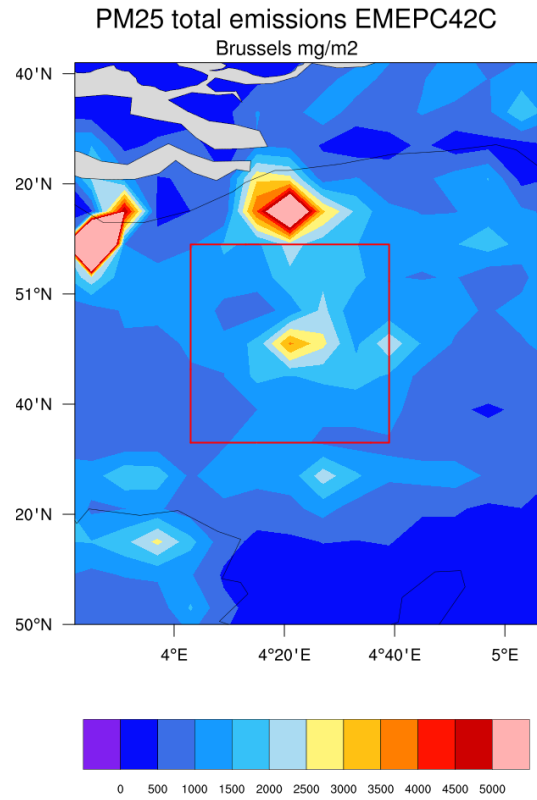

(e)

(f)

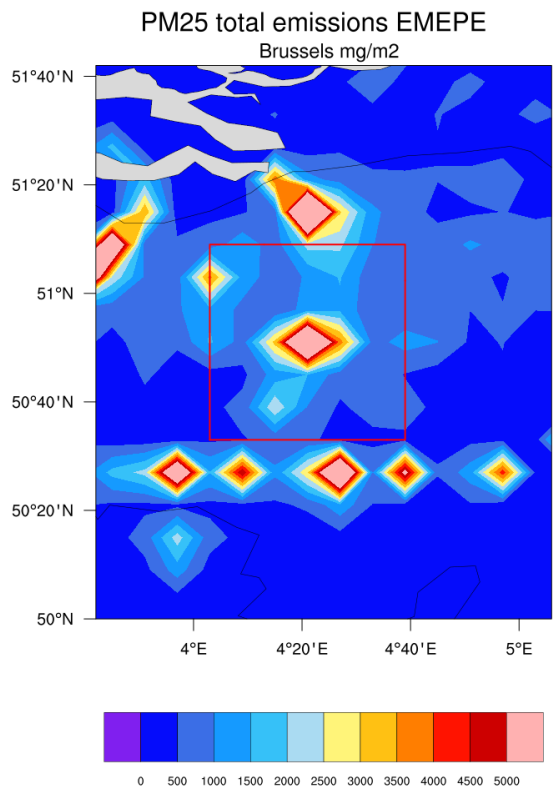

(g)

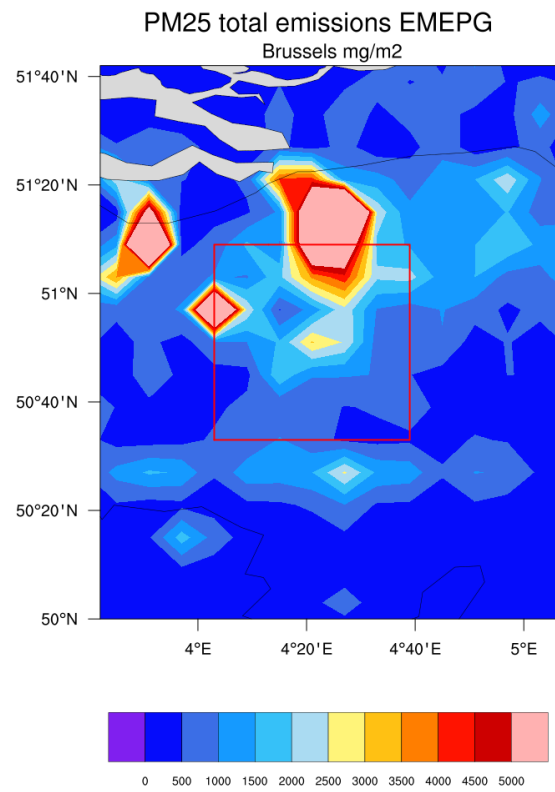

(h)

PM25 total emissions EMEPC2  
Bucharest mg/m2

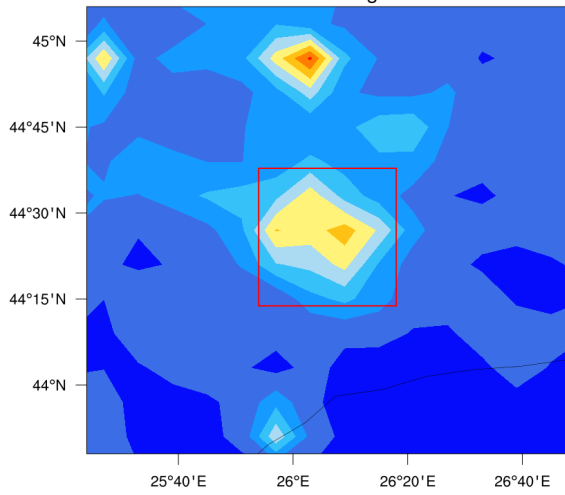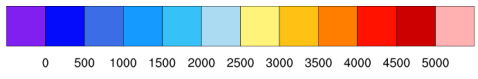

(i)

PM25 total emissions EMEPC42C  
Bucharest mg/m2

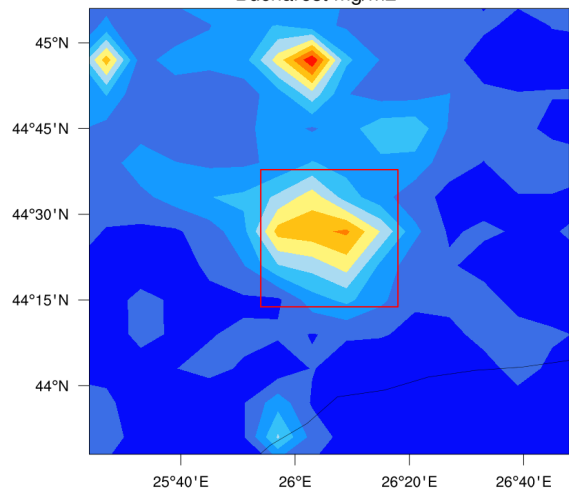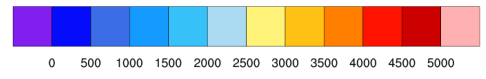

(j)

PM25 total emissions EMEPE  
Bucharest mg/m2

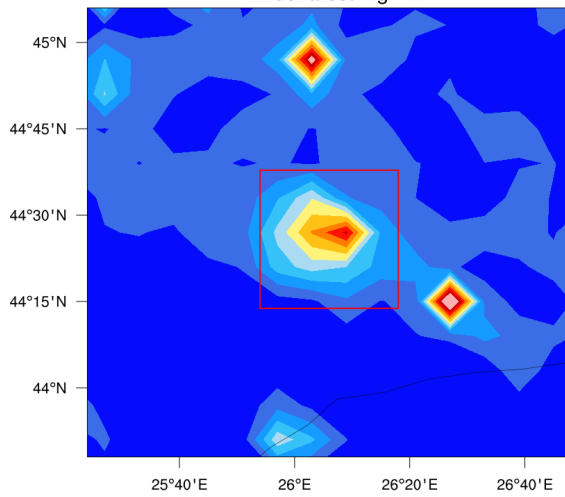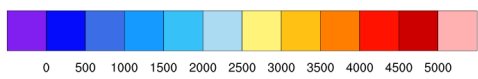

(k)

PM25 total emissions EMEPG  
Bucharest mg/m2

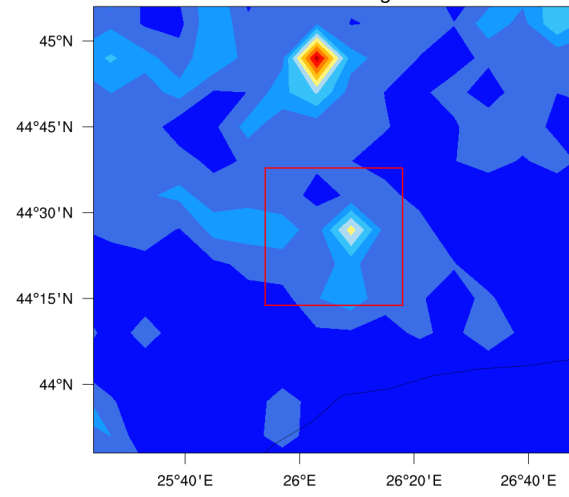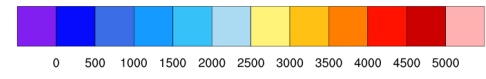

(l)

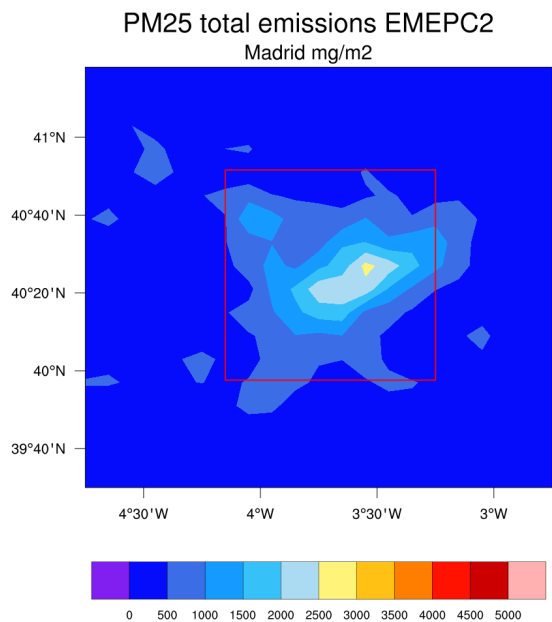

(m)

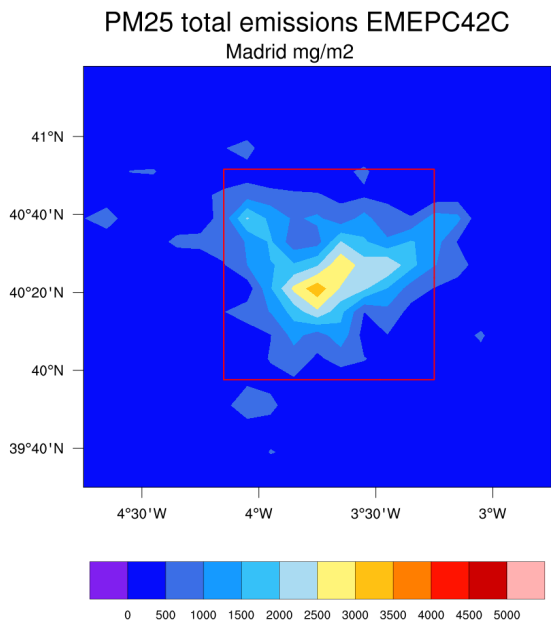

(n)

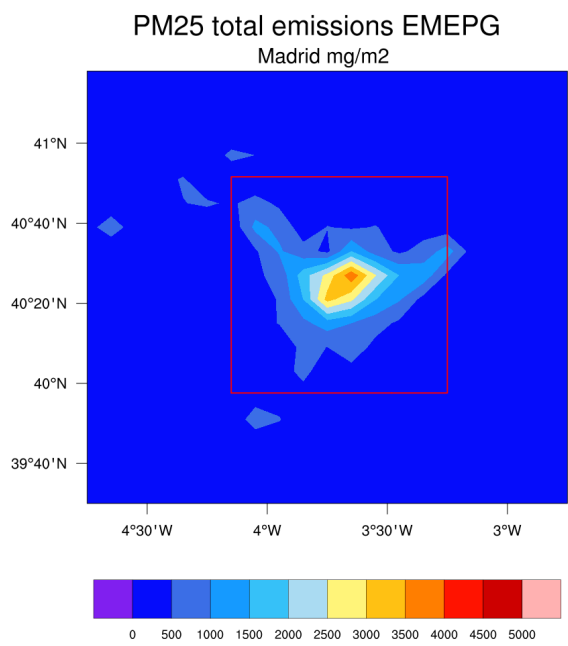

(o)

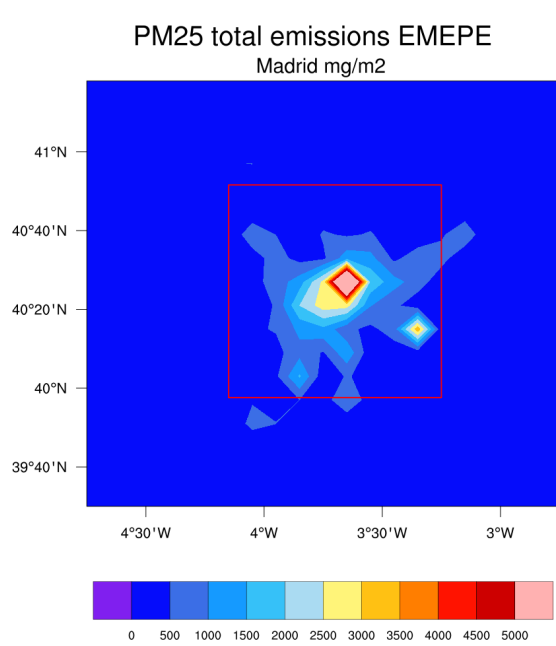

(p)

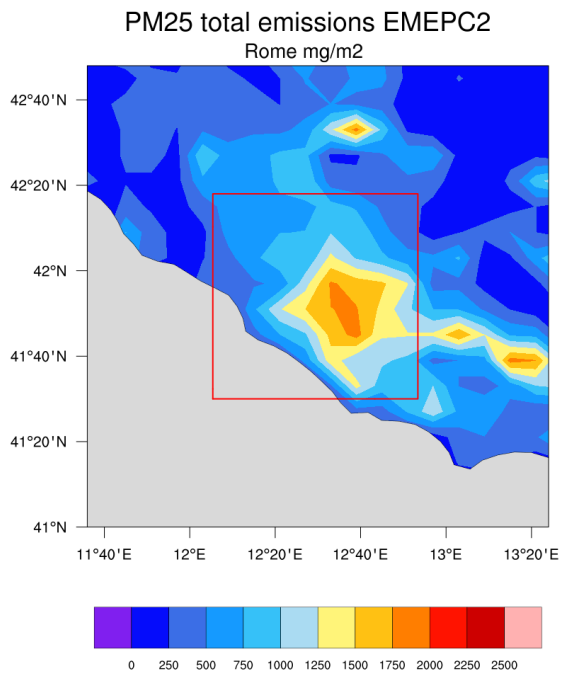

(p)

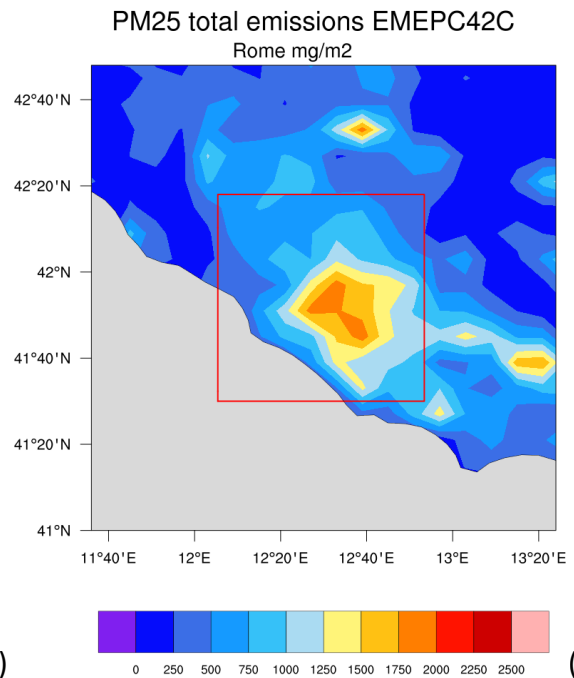

(q)

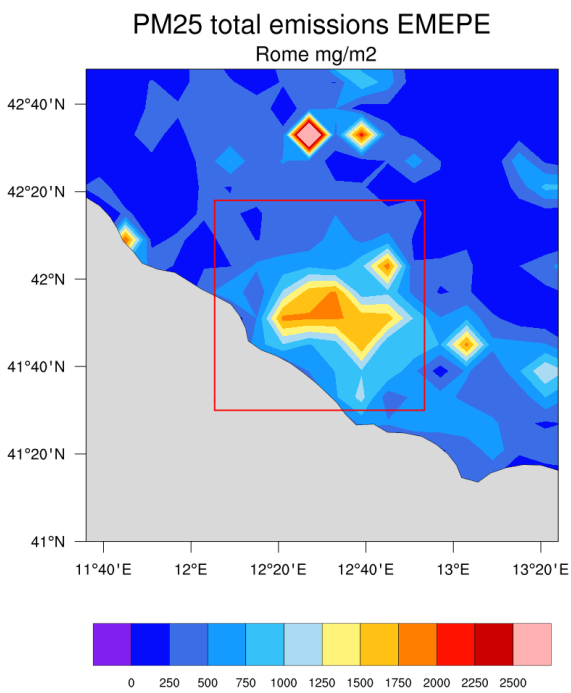

(r)

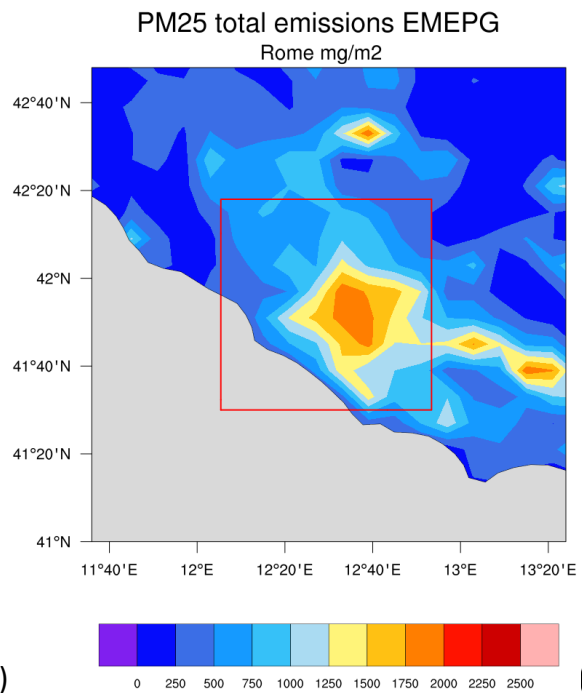

(s)

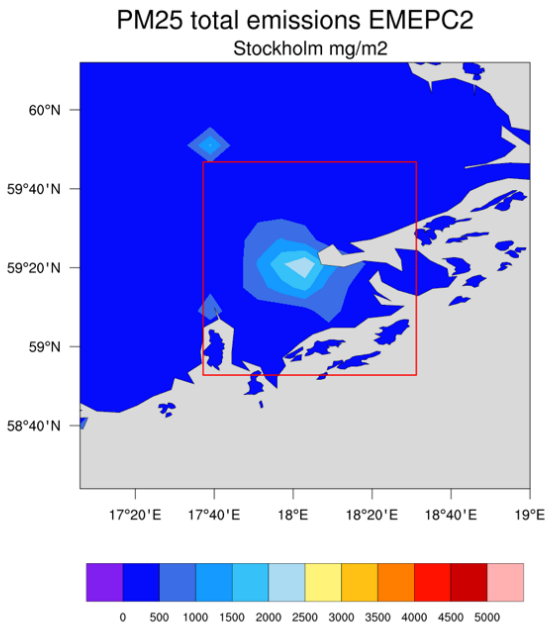

(u)

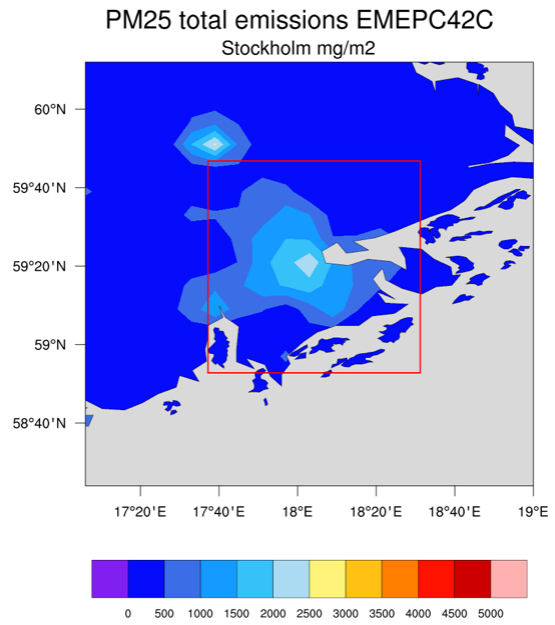

(v)

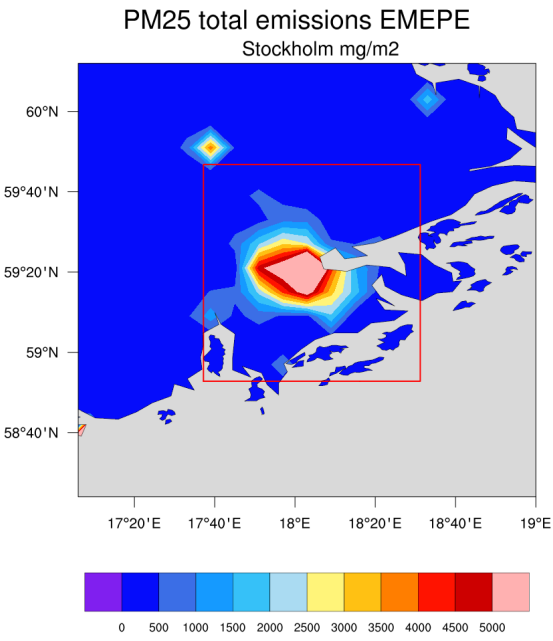

(w)

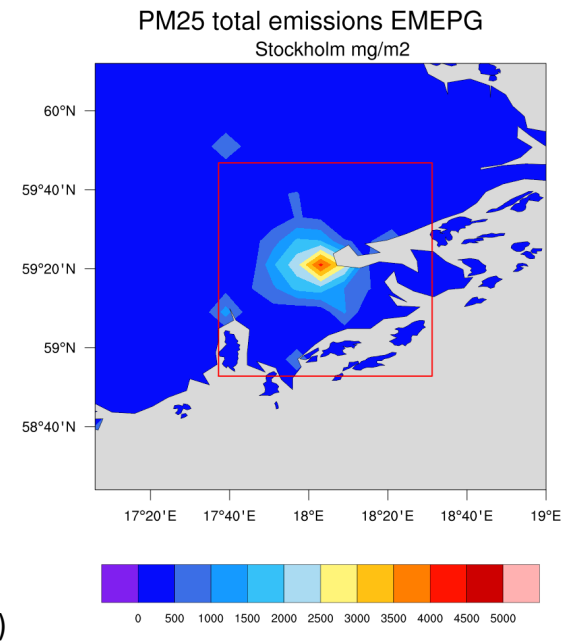

(x)



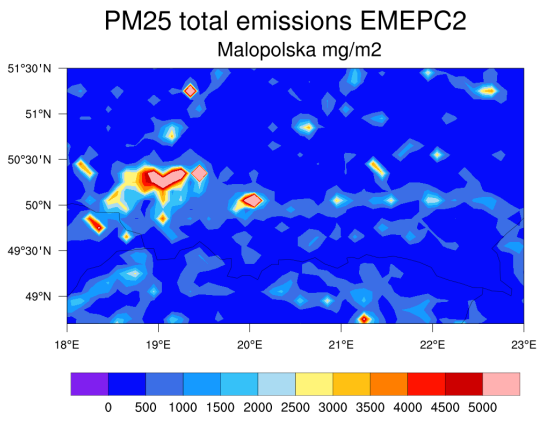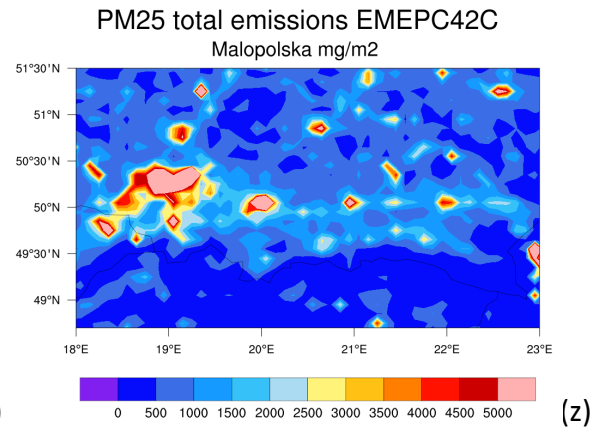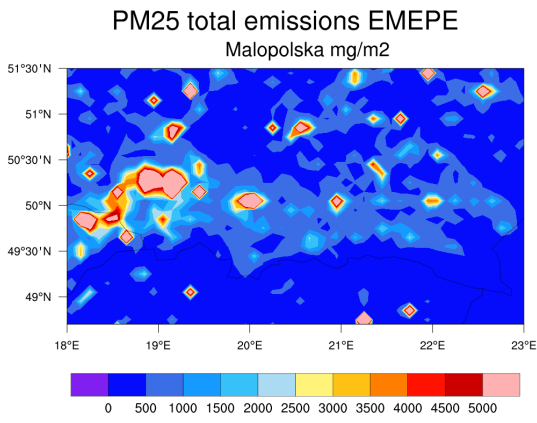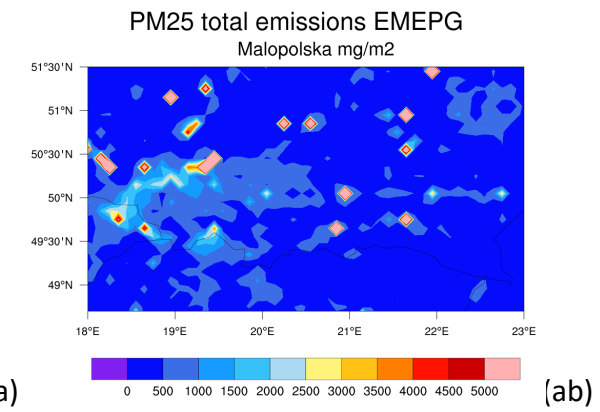

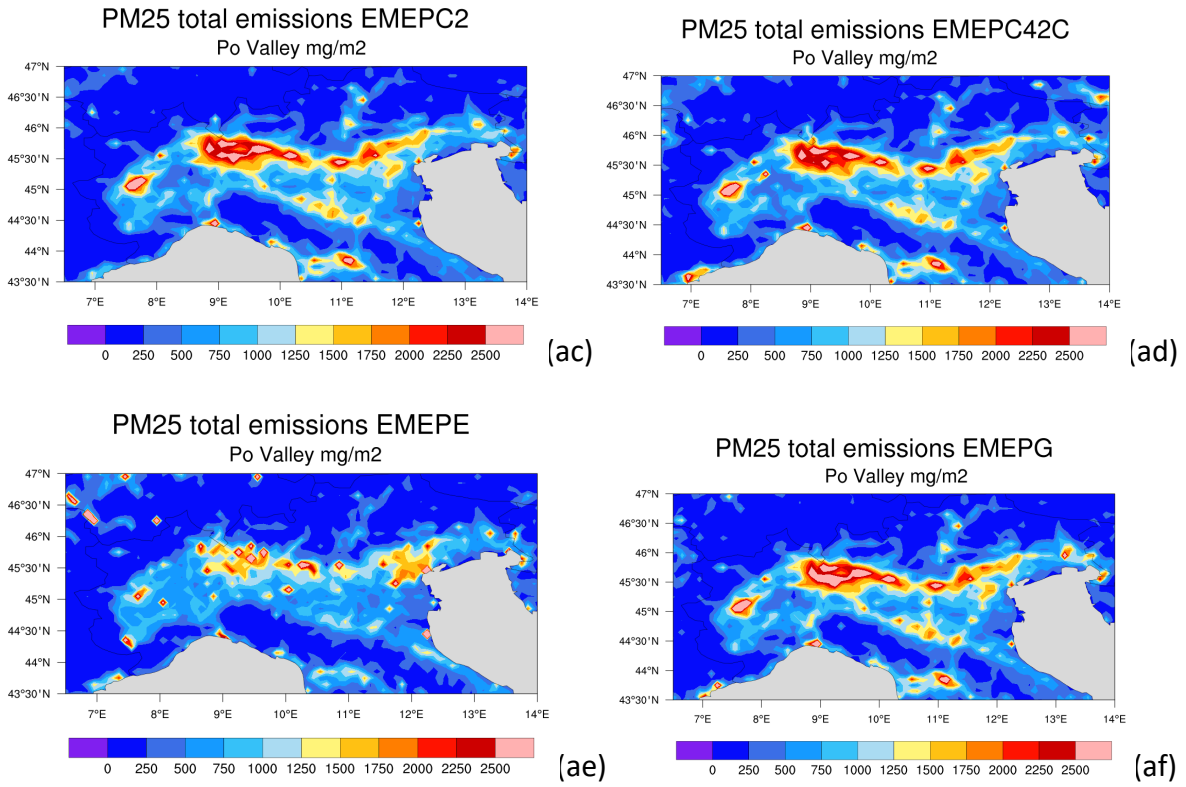

60

Figure S1: PM25 geographical distribution (mg/m2/year) for EMEPC2, EMEPC42C, EMEPE and EMEPG for Berlin, (a-d) Brussels (e-h), Bucharest (i-l), Madrid (m-p), Rome (q-t), Stockholm (u-x), Malopolska (y-ab) and Po Valley (ac-af). The red rectangle represents the area for which the emissions were reduced, as indicated in Table S1.

65

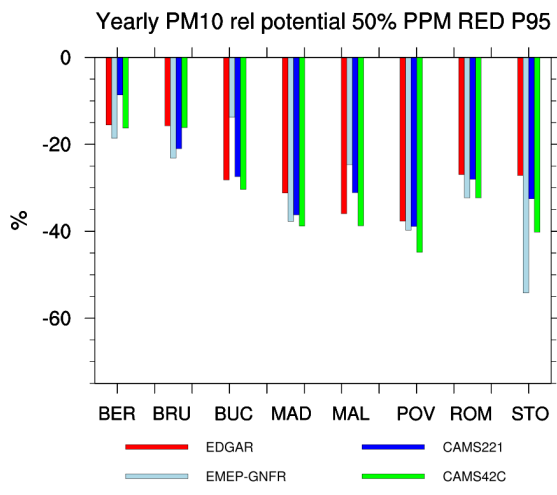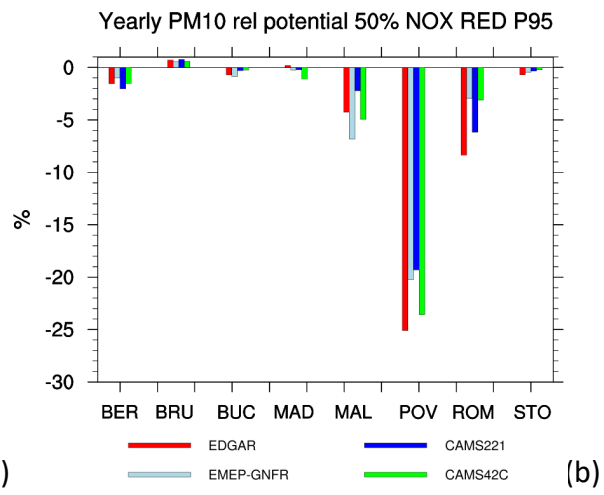

(a)

(b)

70

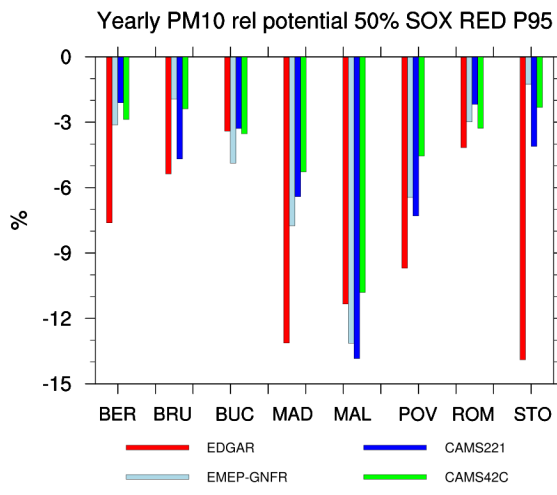

(c)

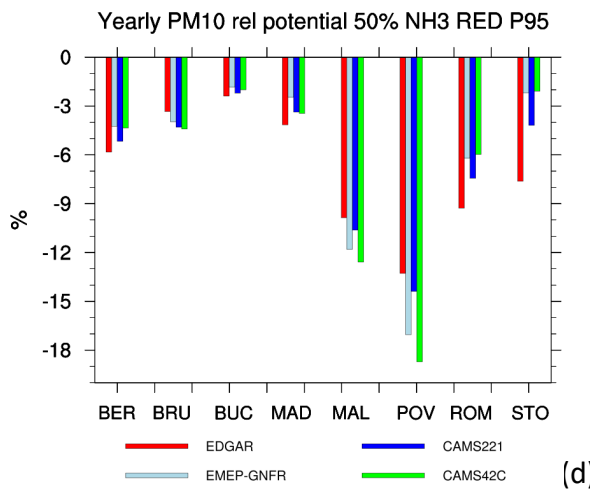

(d)

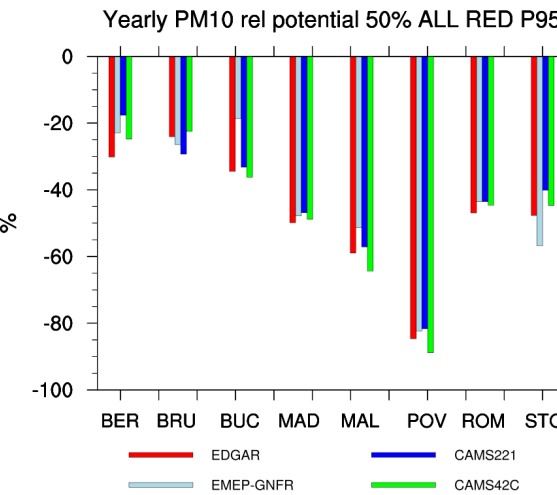

(e)

75 **Figure S2: Yearly average relative potential for 50% reduction of (a) NO<sub>x</sub>, (b) SO<sub>x</sub>, (c) NH<sub>3</sub> and (d) all precursors together (ALL: VOC, SO<sub>x</sub>, NH<sub>3</sub>, PPM) on relative PM<sub>10</sub> concentration change. The values given represent 95 Percentile values (P95), showing the highest 5% values in the domain for the BaseCase. EMEPE (red), EMEPG (light blue), EMEPC2 (blue) and EMEPC42C (green), for the eight locations (Berlin, Brussels, Bucharest, Madrid, Malopolska region, Po Valley region, Rome and Stockholm.**

80

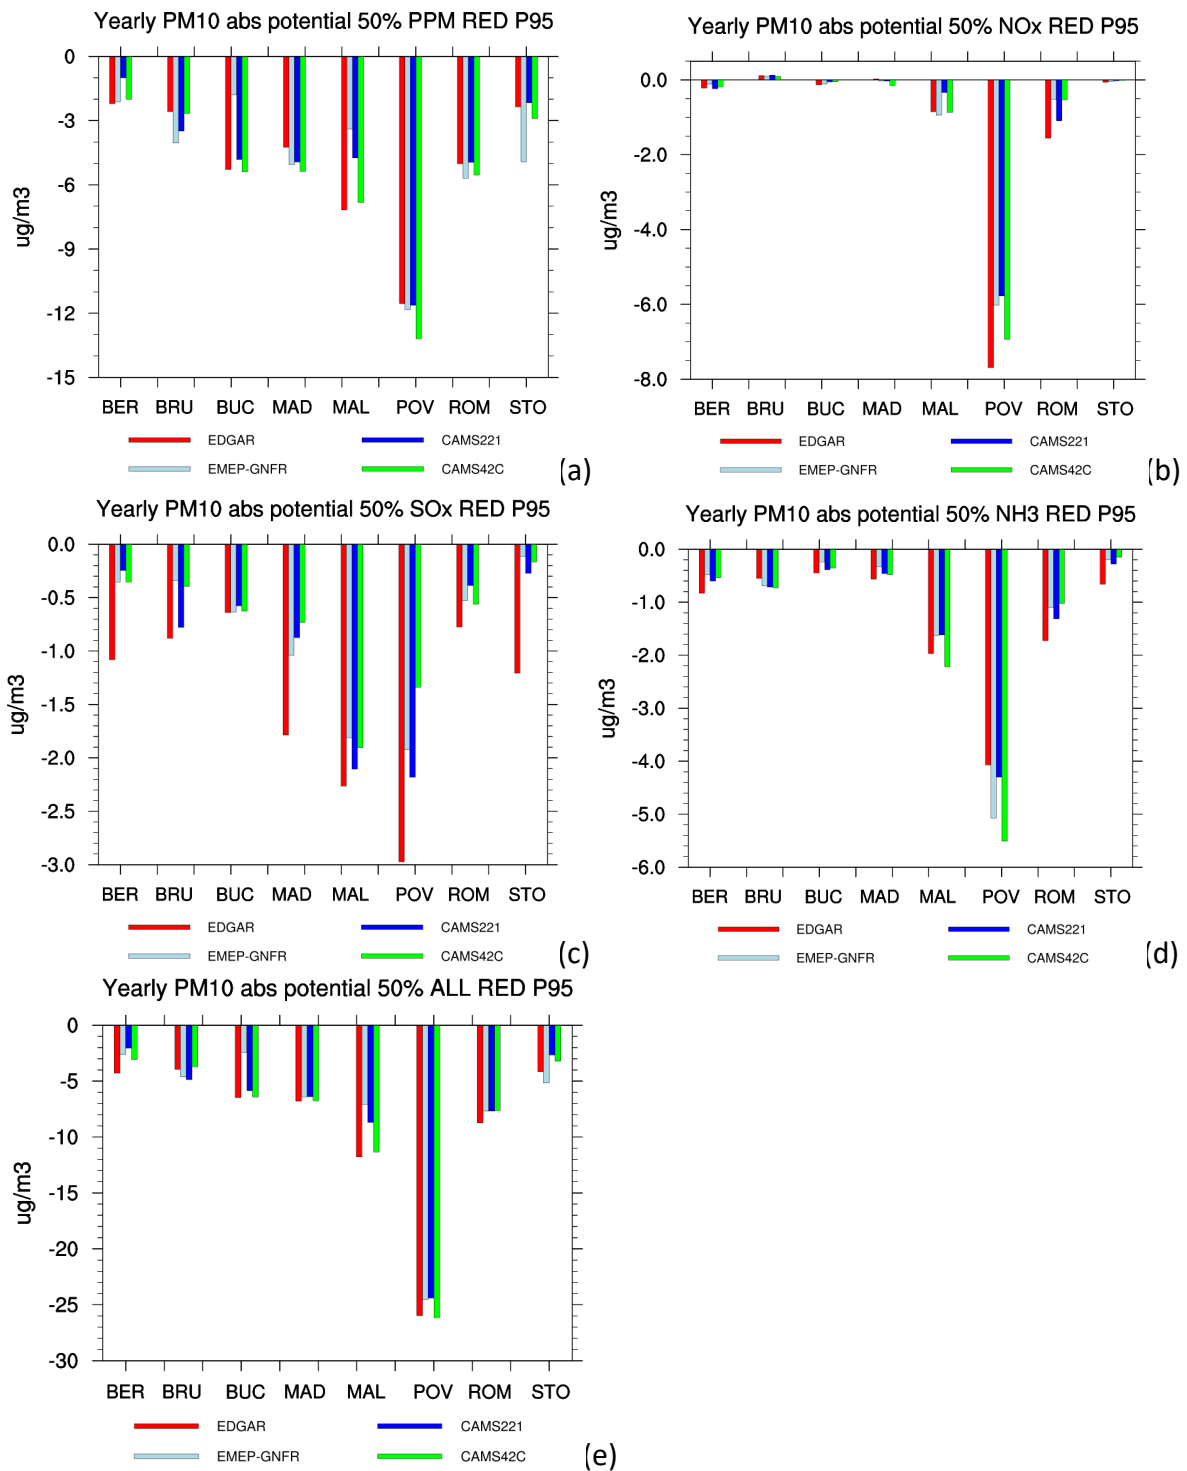

85

90

Figure S3: Yearly average absolute potential for 50% reduction of (a) NOx, (b) SOx, (c) NH3 and (d) all precursors together (ALL: VOC, SOx, NH3, PPM) on relative PM10 concentration change. The values given represent 95 Percentile values (P95), showing the highest 5% values in the domain for the BaseCase. EMEPE (red), EMEPG (light blue), EMEPC2 (blue) and EMEPC42C (green), for the eight locations (Berlin, Brussels, Bucharest, Madrid, Malopolska region, Po Valley region, Rome and Stockholm).

When NOx emissions are reduced by 50% (Fig. S2 and S3), we see in general a decrease in calculated PM10 concentrations, but for Brussels we see a slight increase. The reason for this is that over urbanized areas, lower

95 NO<sub>2</sub> concentrations at constant or similar VOC concentrations lead to an increase of ozone (O<sub>3</sub>) values. O<sub>3</sub> is a reactive oxidant in natural and polluted atmosphere and increasing levels of O<sub>3</sub> concentrations lead to an enhancement of the atmospheric oxidizing capacity, which might lead to an increase in the Secondary Organic Aerosol (SOA) formation and Organic Aerosol (OA) components (Thunis et al., 2021a and references therein).  
100 It appears that reducing PPM emissions by 50% shows the largest effective measure to reduce PM<sub>10</sub> concentrations when compared to the aerosol precursors.

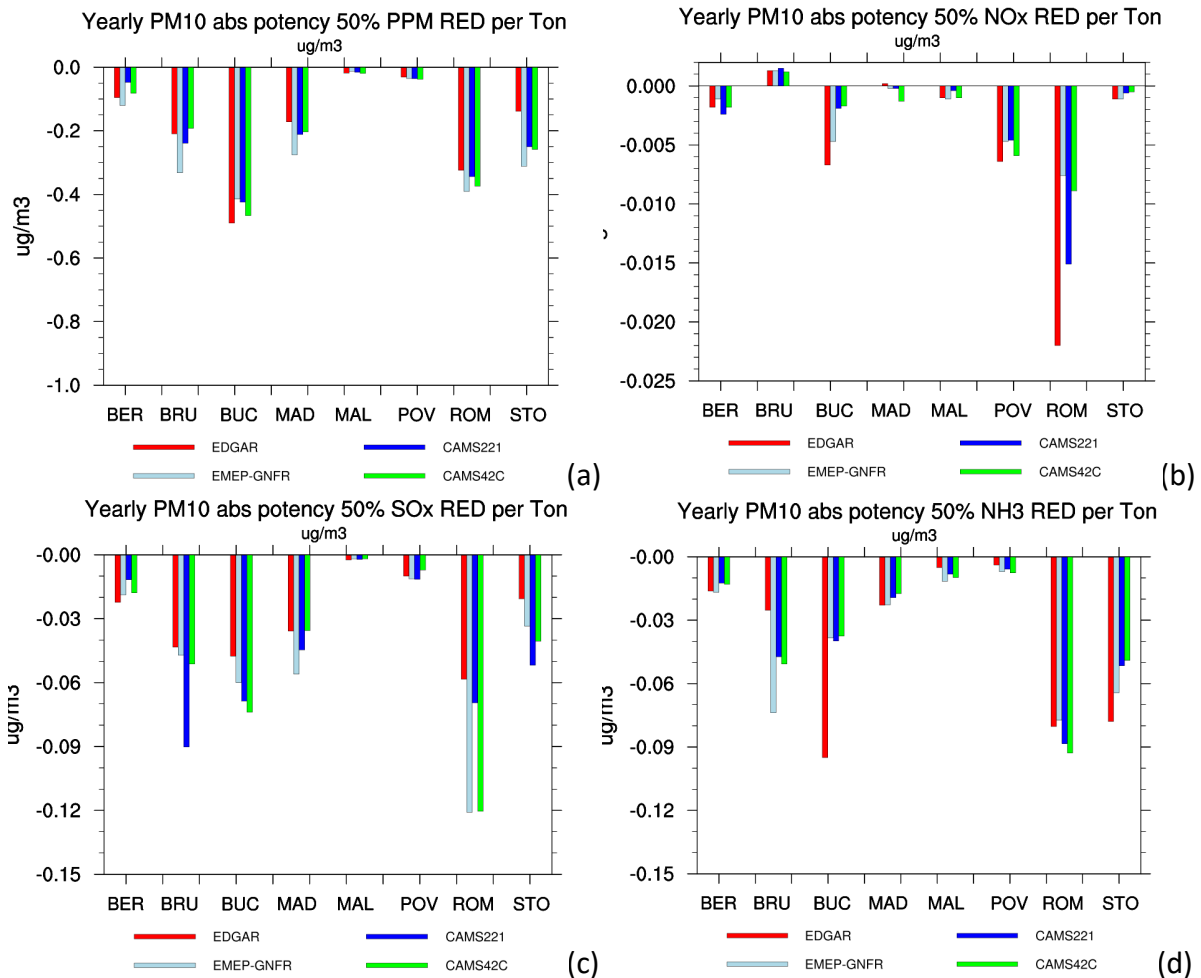

105

Figure S4: Yearly average absolute potency for 50% reduction of (a) PPM, (b) NO<sub>x</sub>, (c) SO<sub>x</sub>, (d) NH<sub>3</sub> on PM10 concentration change. The values given represent 95 Percentile values, showing the highest 5% values in the domain for the BaseCase. EMEPE (red), EMEPG (light blue), EMEPC2 (blue) and EMEPC42C (green), for the eight locations (Berlin [BER], Brussels [BRU], Bucharest [BUC], Madrid [MAD], Malopolska region [MAL], Po Valley region [POV], Rome [ROM] and Stockholm [STO]).

110

The very low values in the potencies for Malopolska and Po Valley can be explained by the fact that we divide by the emissions that are much larger, because they cover an entire region rather than a city.

115

We see that the most effective reduction of the secondary aerosol part is obtained by reducing SO<sub>x</sub> emissions, because the potencies for SO<sub>x</sub> are in general higher than for NO<sub>x</sub>.

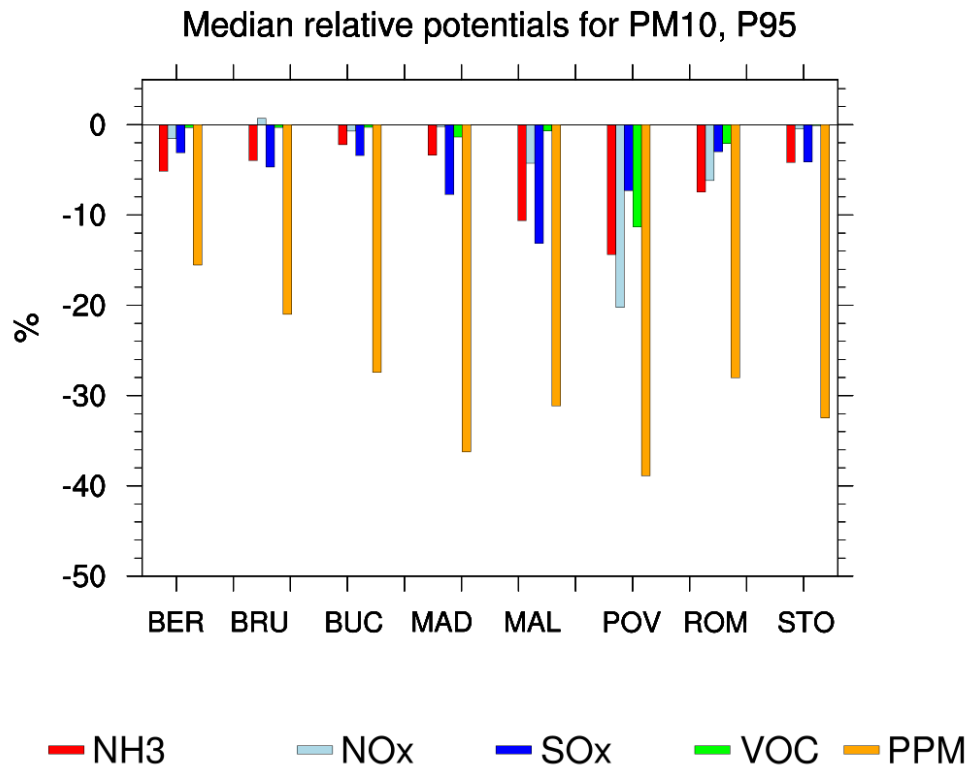

120 **Figure S5: Median relative potential for PM10 for the eight locations, Berlin [BER], Brussels [BRU], Bucharest [BUC], Madrid [MAD], Malopolska region [MAL], Po Valley region [POV], Rome [ROM] and Stockholm [STO]). The median is based on EMEPE, EMEPC2 and EMEPG. The values given represent 95 Percentile values, showing the highest 5% values in the domain for the BaseCase.**

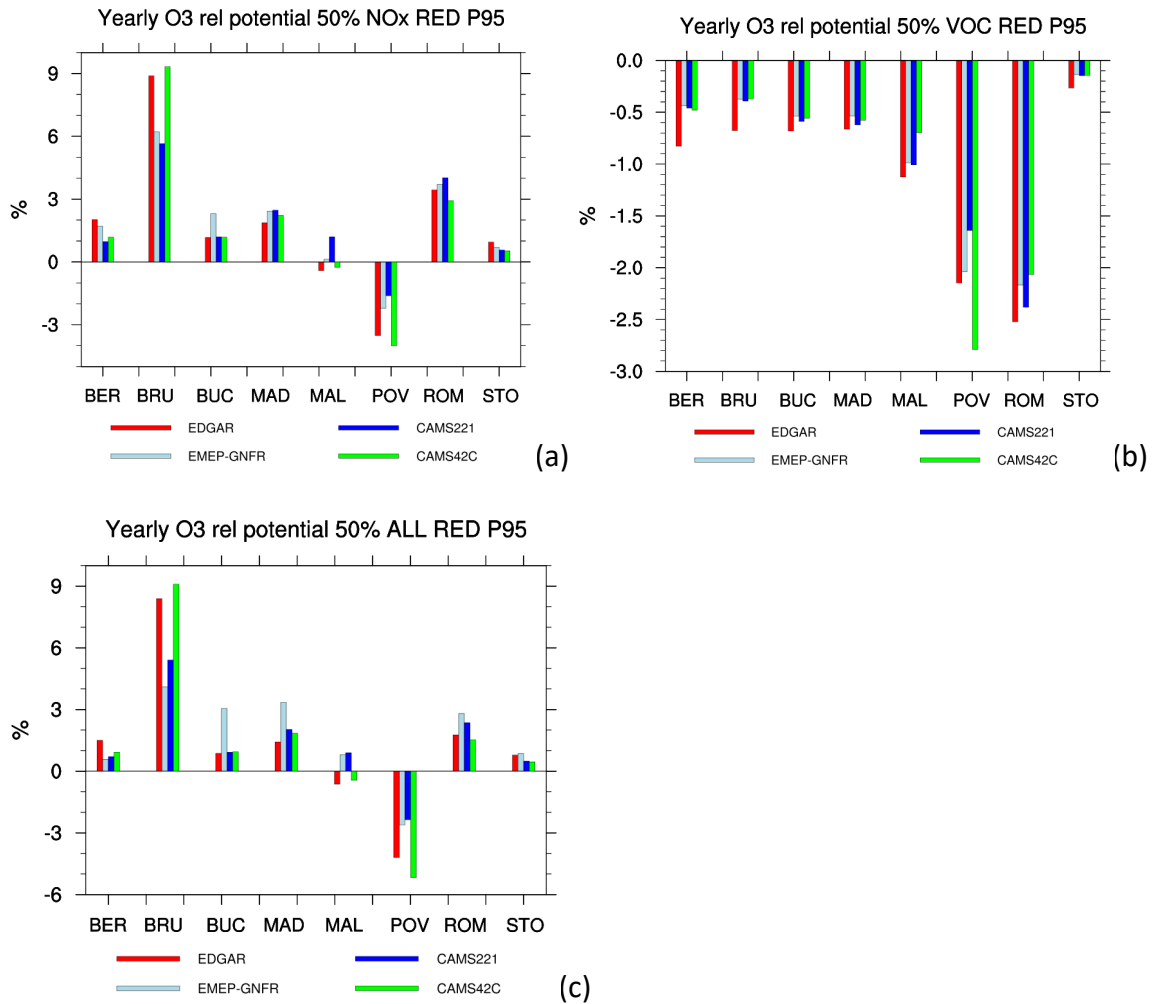

125

130

Figure S6: Yearly average relative potential for 50% reduction of (a) NO<sub>x</sub>, (b) VOC and (c) ALL (NO<sub>x</sub> + VOC) on relative O<sub>3</sub> concentration change. The values given represent 95 Percentile values (P95), showing the highest 5% values in the domain for the BaseCase. EMEPE (red), EMEPG (light blue), EMEPC2 (blue) and EMEPC42C (green), for the eight locations (Berlin [BER], Brussels [BRU], Bucharest [BUC], Madrid [MAD], Malopolska region [MAL], Po Valley region [POV], Rome [ROM] and Stockholm [STO]).

135

Whether reductions in NO<sub>x</sub> or VOC emissions will lead to lower O<sub>3</sub> concentrations depend on location and on the type of chemical regime, also better known as NO<sub>x</sub> - or VOC-limited regimes. This means that for NO<sub>x</sub> - limited regimes (locations downwind of urban and suburban areas), lowering NO<sub>x</sub> concentrations at constant VOC levels or in combination with lowering VOCs results in lower O<sub>3</sub> peak concentrations. So, decreasing the available NO<sub>x</sub> leads directly to a decrease in ozone. In VOC-limited areas (highly polluted urban areas), where

140

VOCs are kept constant, but NO<sub>x</sub> emissions are reduced, lead to, opposite, higher O<sub>3</sub> concentrations (Fig. S6a). On the other hand, lowering VOCs and keeping NO<sub>x</sub> constant lead to reduced O<sub>3</sub> values (Fig. S6b). When VOCs and NO<sub>x</sub> are decreased proportionately at the same time O<sub>3</sub> increase (Fig. S6c).

145

The underlying reason for the increase when NO<sub>x</sub> emissions are reduced is that less O<sub>3</sub> is removed by NO (NO<sub>x</sub> -titration), therefore augmenting O<sub>3</sub> values in VOC-limited zones, as mentioned earlier. Therefore, we see in general an increase in O<sub>3</sub> values over the urban areas. The side-effect of reducing NO<sub>x</sub> emissions in urban areas



(e.g. via traffic) lead to higher O<sub>3</sub> concentrations and possible exceedances in cities that are currently below the O<sub>3</sub> limit values.

150

The negative RP and AP for POV (Fig. S6 and S7) can be explained by the fact that the domain is large when compared to cities (e.g. Brussels, Bucharest, Madrid) and that background concentrations might have an impact on the P95 values. In sub-urban and background areas O<sub>3</sub> decrease when NO<sub>x</sub> emissions are reduced, as mentioned in the main text.

155

Fig. S6a shows that for Malopolska, the 50% NO<sub>x</sub> reduction can lead to an increase or decrease on O<sub>3</sub> concentrations depending on the choice of emission inventory.

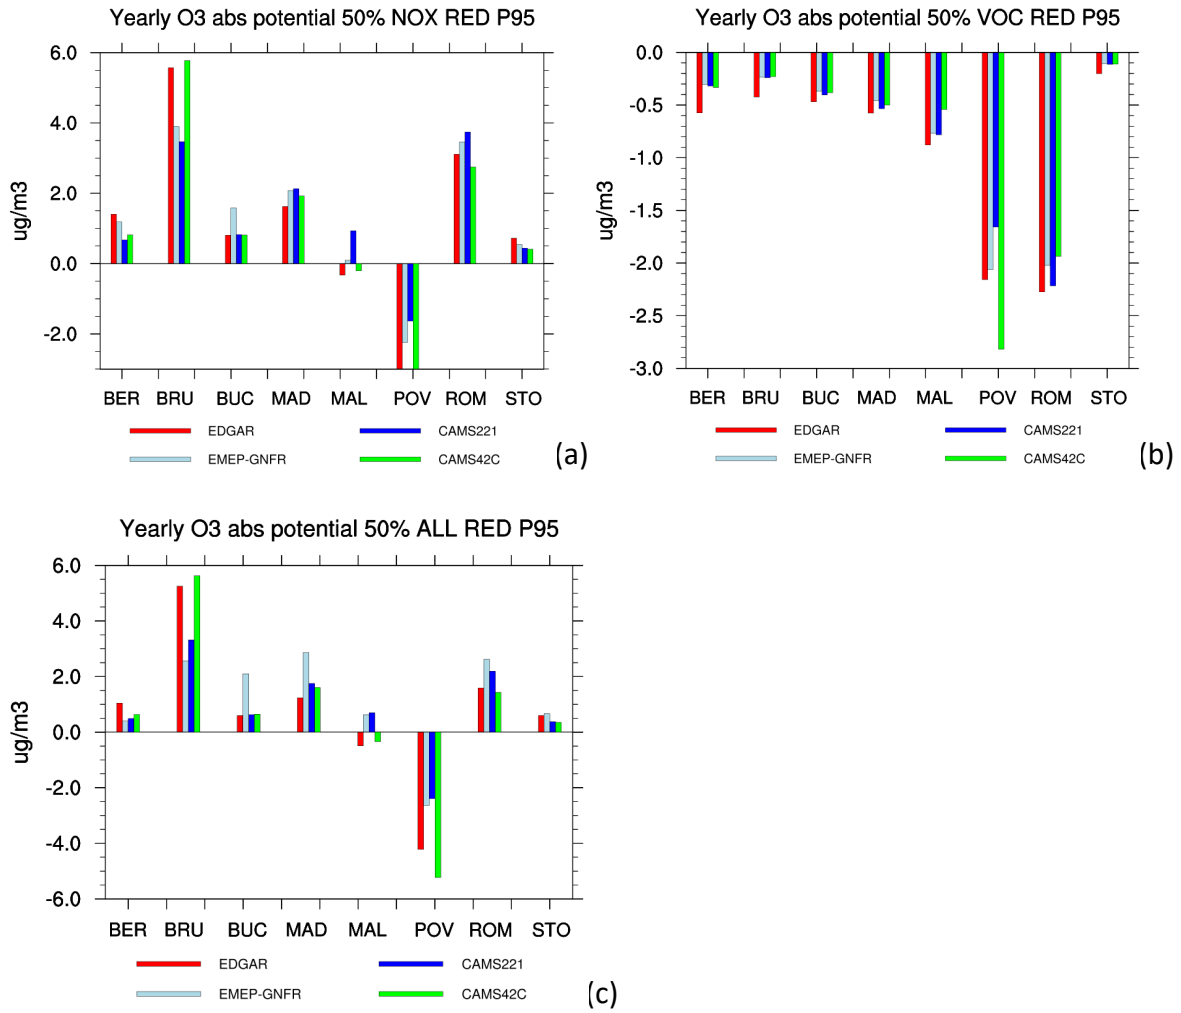

165 **Figure S7: Yearly average absolute potential for 50% reduction of (a) NO<sub>x</sub>, (b) VOC and (c) ALL (NO<sub>x</sub> + VOC) on relative O<sub>3</sub> concentration change. The values given represent 95 Percentile values (P95), showing the highest 5% values in the domain for the BaseCase. EMEPE (red), EMEPG (light blue), EMEPC2 (blue) and EMEPC42C (green), for the eight locations (Berlin [BER], Brussels [BRU], Bucharest [BUC], Madrid [MAD], Malopolska region [MAL], Po Valley region [POV], Rome [ROM] and Stockholm [STO]).**

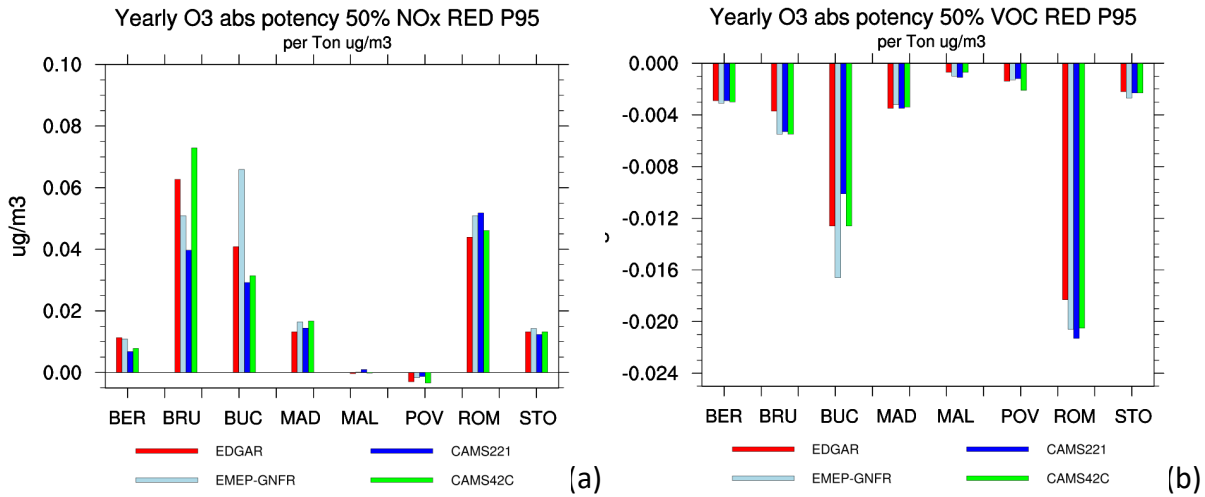

175 **Figure S8: Yearly average potency for (a) 50% NO<sub>x</sub> and (b) 50% VOC reduction on O<sub>3</sub> concentration change (µg/m<sup>3</sup>) per ton emission reduction by EMEPE (red), EMEPG (light blue), EMEPC2 (blue) and EMEPC42C (green), for the eight locations (Berlin [BER], Brussels [BRU], Bucharest [BUC], Madrid [MAD], Malopolska region [MAL], Po Valley region [POV], Rome [ROM] and Stockholm [STO]). The values given in (a) and (b) represent 95 Percentile values (P95), showing the highest 5% values in the domain for the BaseCase.**

180

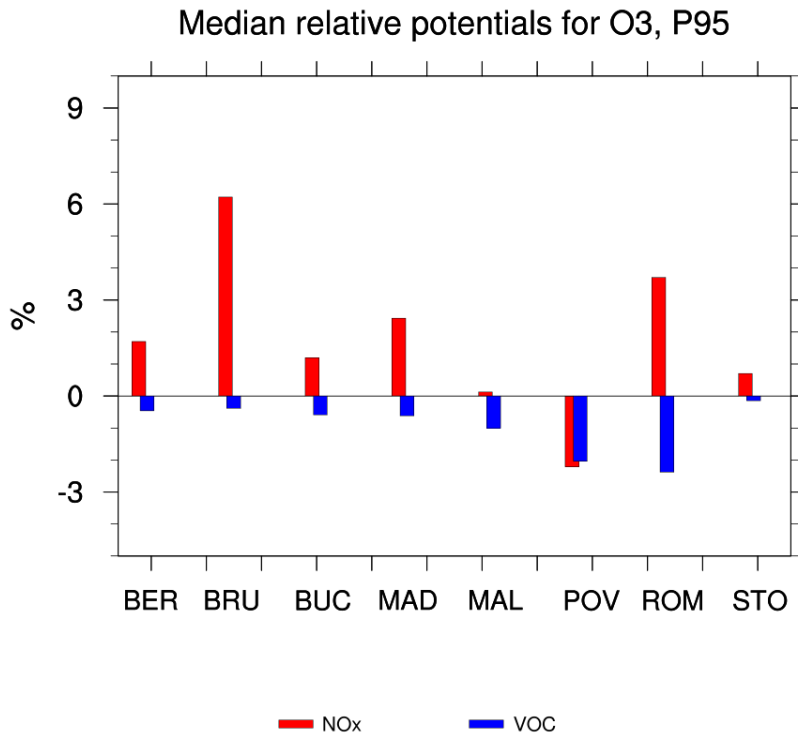

185 **Figure S9: Median relative potential for O<sub>3</sub> for the eight locations, Berlin [BER], Brussels [BRU], Bucharest [BUC], Madrid [MAD], Malopolska region [MAL], Po Valley region [POV], Rome [ROM] and Stockholm [STO]). The median is based on EMEPE, EMEPC2 and EMEPG. The values given represent 95 Percentile values, showing the highest 5% values in the domain for the BaseCase.**
